# Supplementary material
Source: MDPI journal article supplement (https://www.mdpi.com/2571-9408/5/4/203)
Supplement: s1 [file s1 › heritage-2055876-supplementary.pdf]

## Supplementary Material

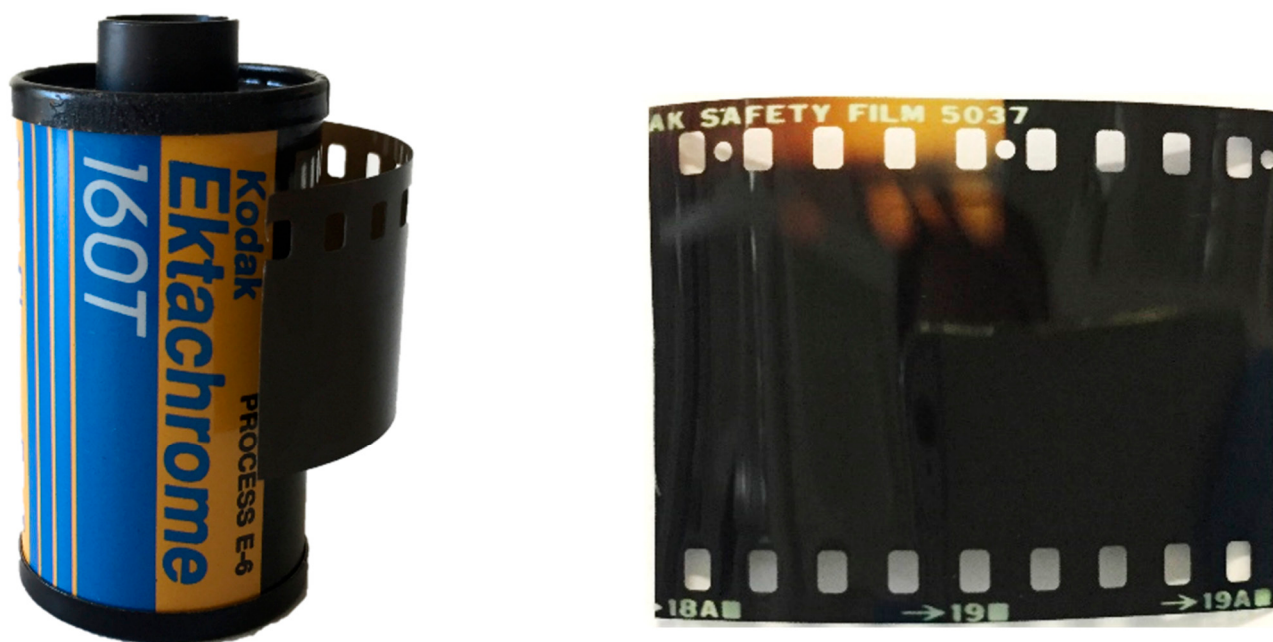

**Figure S1.** Ektachrome 160T Professional (EPT) found in Ângelo de Sousa's archive: unprocessed roll (left), and sample/film tip used for the investigation carried out within this study (right).

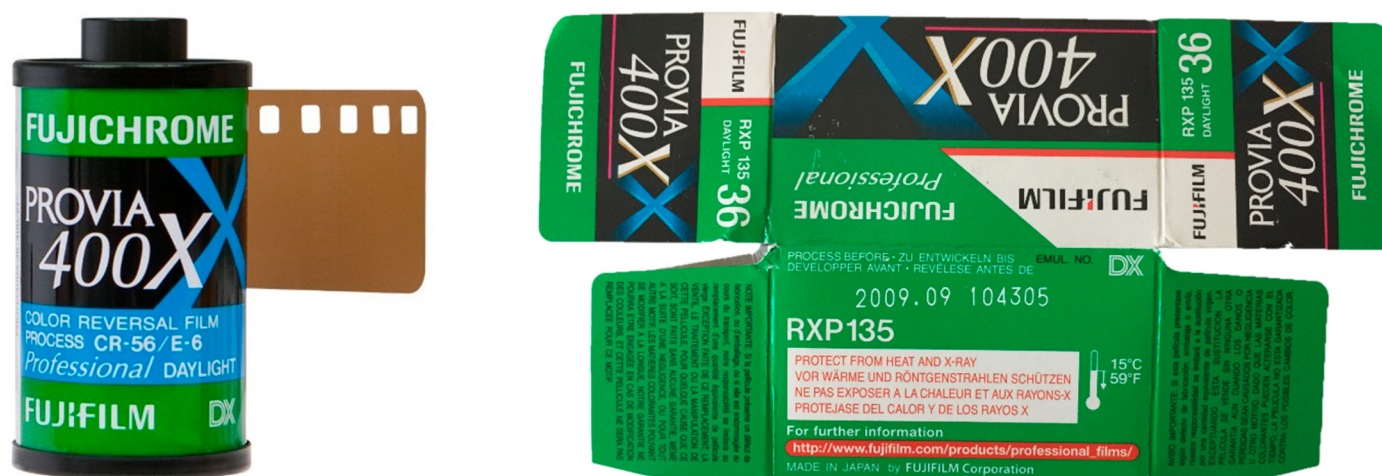

**Figure S2.** Fujichrome Provia 400X Professional (RXP) found in Ângelo de Sousa's archive: unprocessed roll (left), and commercial box where the expiration date is visible (right).

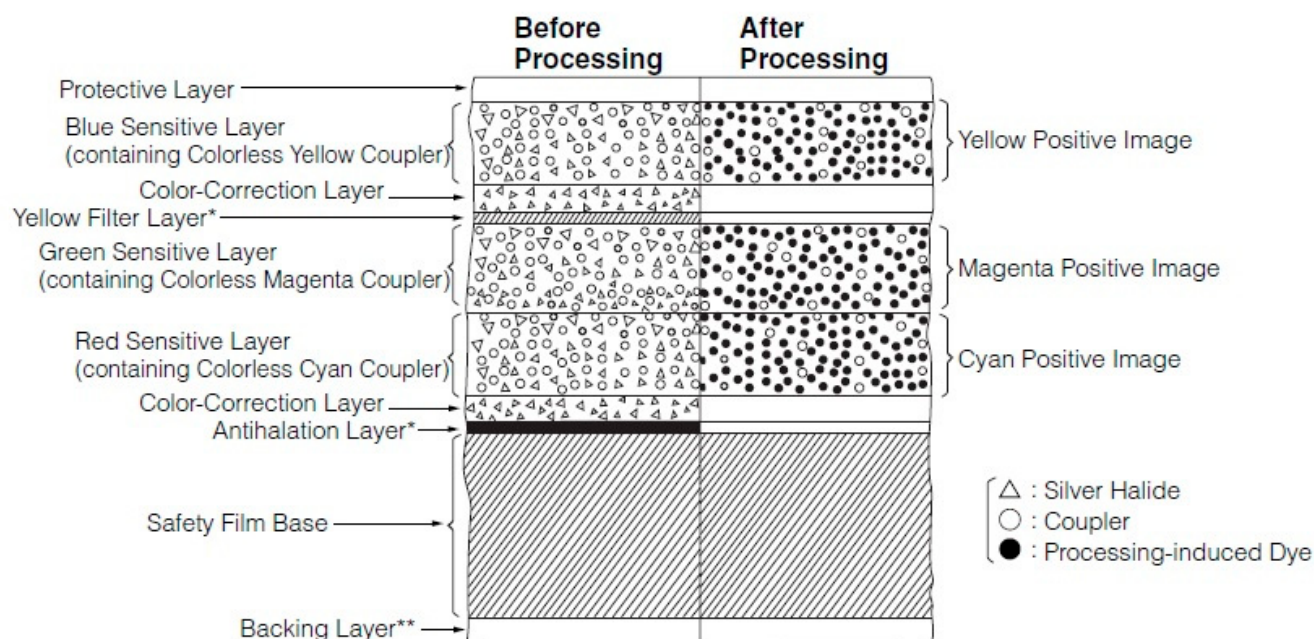

\* These layers become colorless and transparent after processing.

\*\* 135-size film does not have a backing layer.

**Figure S3.** Schematic cross-section of Fujichrome Provia 400X Professional (RXP) (data sheet from the manufacturer).

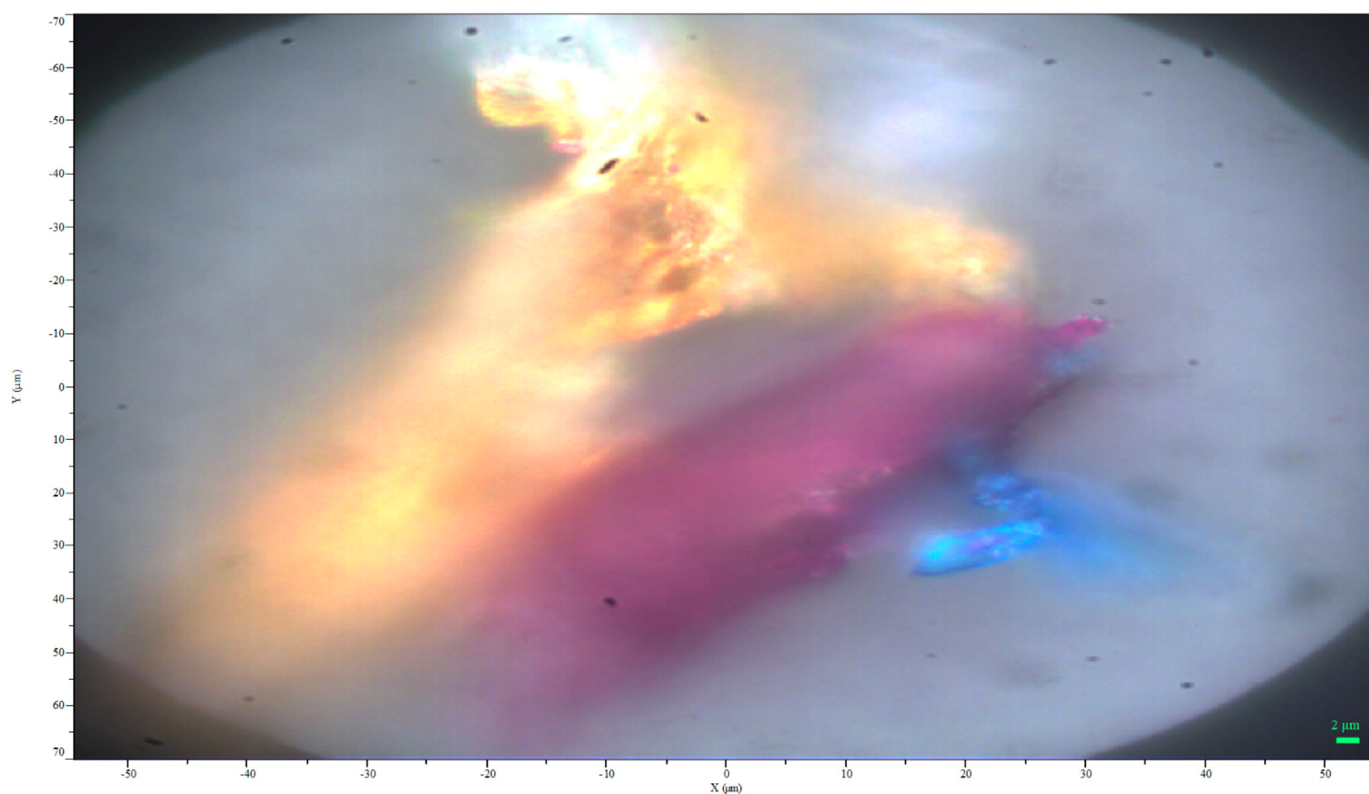

**Figure S4.** Microscopy image of a micro-sample collected from Ektachrome 160T Professional (EPT) for analysis with Raman spectroscopy, where yellow, magenta and cyan layers are discernible.

**Table S1.** Absorbance maximum ( $\lambda_{\max}$ ) and retention times ( $R_t$ ) of dyes extracted from Ektachrome 160T Professional (EPT) and Fujichrome Provia 400X Professional (RXP).

|            | Cyan                  |             | Magenta               |             | Yellow                |             |
|------------|-----------------------|-------------|-----------------------|-------------|-----------------------|-------------|
|            | $\lambda_{\max}$ (nm) | $R_t$ (min) | $\lambda_{\max}$ (nm) | $R_t$ (min) | $\lambda_{\max}$ (nm) | $R_t$ (min) |
| <b>EPT</b> | 663                   | 31.83       | 551                   | 31.23       | 442                   | 31.98       |
| <b>RXP</b> | 651                   | 33.32       | 546                   | 33.45       | 451                   | 33.93       |
|            |                       |             | 551                   | 37.04       |                       |             |
